# Supplementary material
Source: HighWire-hosted journal article supplement (https://bmjopenquality.bmj.com/content/5/1/u212414.w4934)

FIGURE 3: Run chart demonstrating the time interval from patient admission to first dose of enoxaparin

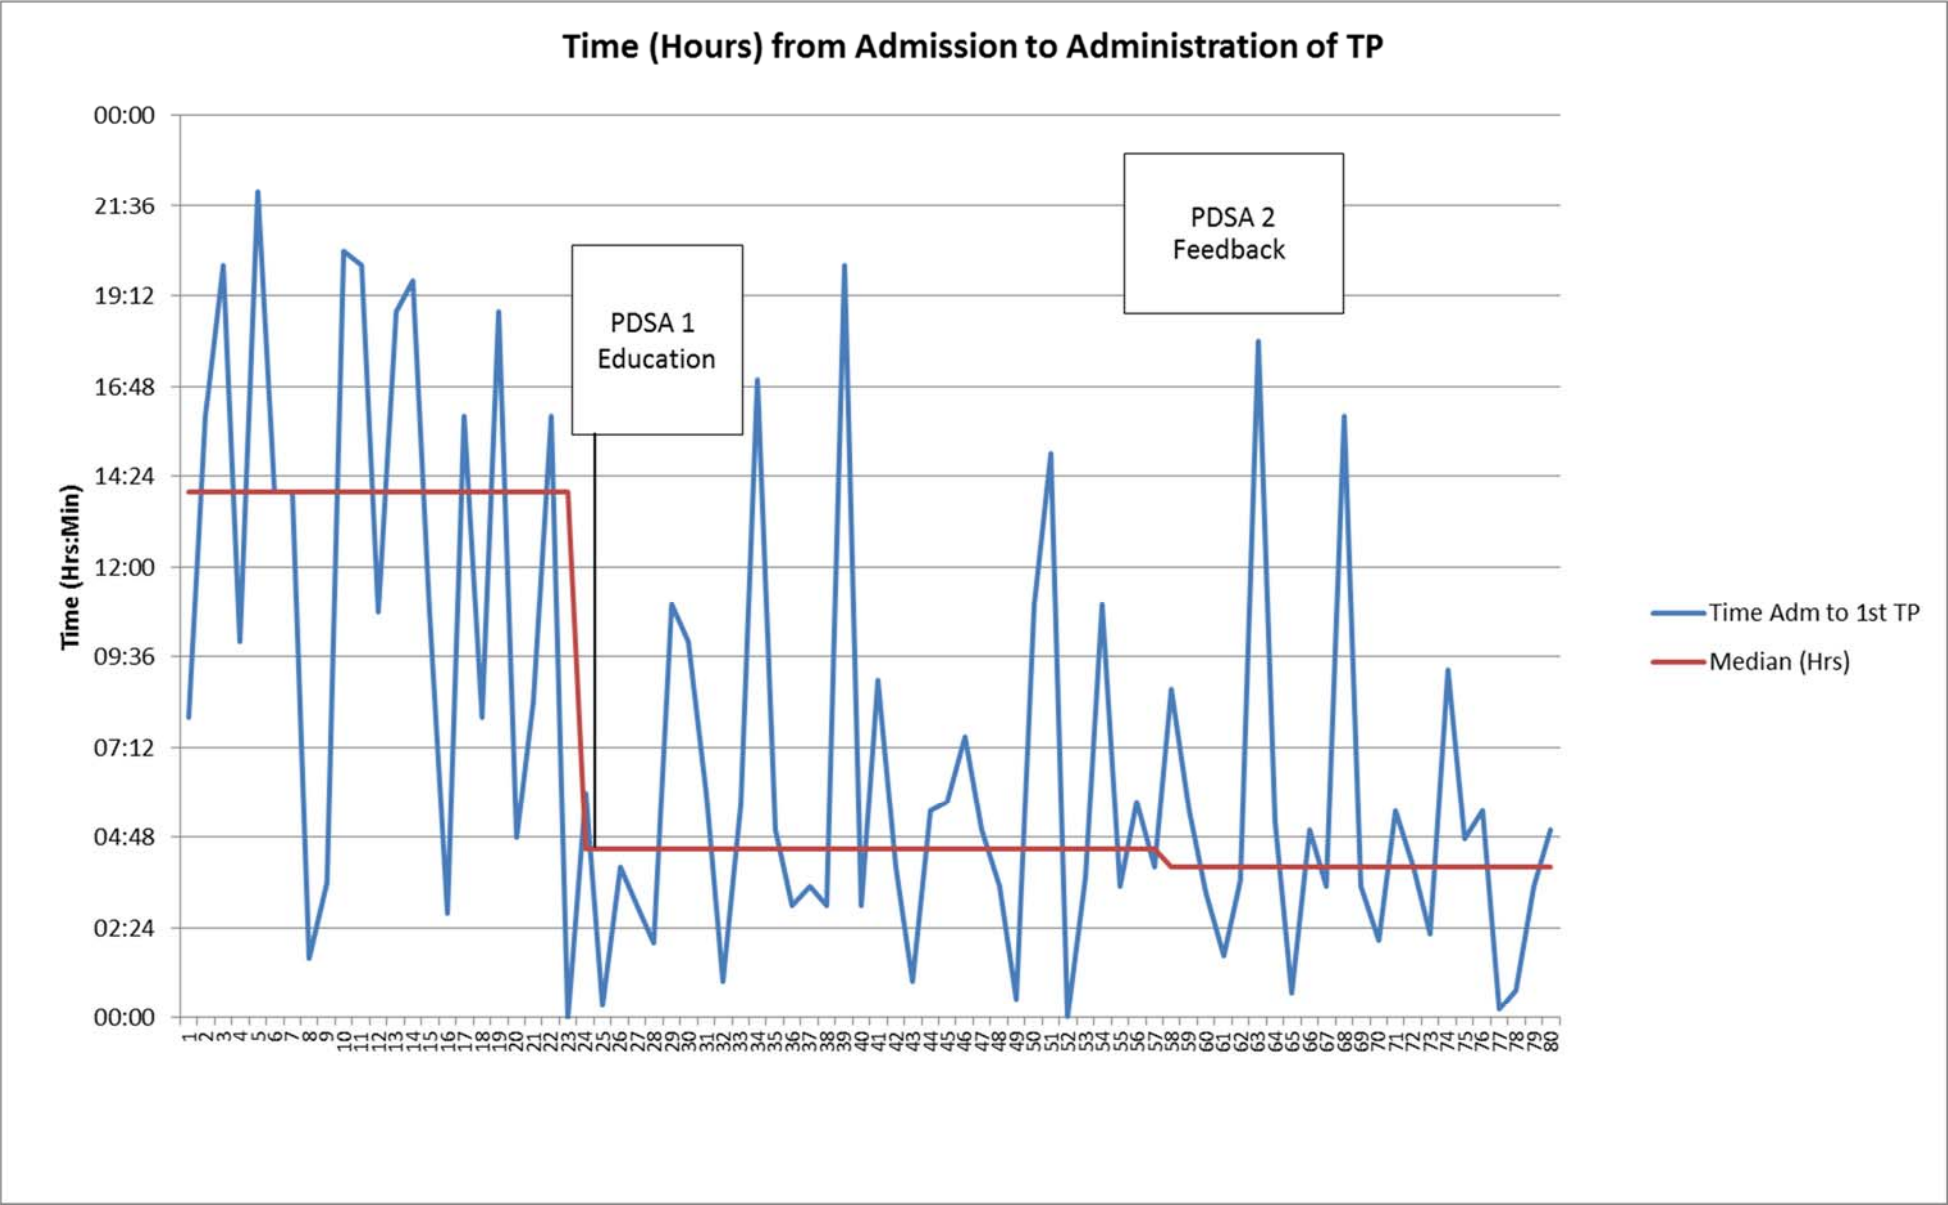

Supplement: inline-supplementary-material-1 [file inline-supplementary-material-1.pdf]
